# Supplementary material for: The Type III Secretion Effector NleE Inhibits NF-κB Activation
Source: PubMed Central journal article supplement (PMC2813277; doi:10.1371/journal.ppat.1000743), 2010-01-29
Supplement: ppat.1000743.s002.pdf [file ppat.1000743.s002.pdf]

| Name    | Description                                                                                                                                         | Primers     | Remarks          | source     |
|---------|-----------------------------------------------------------------------------------------------------------------------------------------------------|-------------|------------------|------------|
| pCN2691 | pGP704 containing 425bps fragment of <i>nleH<sub>PP2</sub></i>                                                                                      | F398, R399  | Amp <sup>R</sup> | This study |
| pSA10   | Expression vector pKK177-3 derivative                                                                                                               |             | Amp <sup>R</sup> | [1]        |
| pSC3753 | pSA10 containing <i>nleE<sub>IE6</sub>-6His</i> , using <i>EcoRI</i> and <i>PstI</i> , PCR on EM3327                                                | F875, R876  | Amp <sup>R</sup> | This study |
| pSC4104 | pSA10 containing <i>nleBE<sub>IE6</sub>-6His</i> with its promoter region, using <i>EcoRI</i> and <i>PstI</i> , PCR on EM3327                       | F941, R876  | Amp <sup>R</sup> | This study |
| pSC4103 | pSA10 containing <i>nleB<sub>IE6</sub>-6his</i> with its promoter region, using <i>EcoRI</i> and <i>PstI</i> , PCR on EM3327                        | F941, R874  | Amp <sup>R</sup> | This study |
| pCN2691 | pGP704 containing 425bps fragment of <i>nleH<sub>PP2</sub></i>                                                                                      | F398, R399  | Amp <sup>R</sup> | This study |
| pCX341  | Vector for formation of fusions with the <i>blaM</i> reporter                                                                                       |             | Tet <sup>R</sup> | [2]        |
| pGH3760 | pCX341 containing <i>nleE<sub>IE2</sub></i> , <i>EcoRI</i> and <i>KpnI</i> , PCR on EM3347                                                          | F807, R808  | Tet <sup>R</sup> | This study |
| pGH3761 | pCX341 containing <i>nleE<sub>IE6</sub></i> , <i>EcoRI</i> and <i>KpnI</i> , PCR on EM3327                                                          | F807, R811  | Tet <sup>R</sup> | This study |
| pMS2841 | The EGFP gene of pEGFP-N1 (Clonotech) was replaced by <i>mCherry</i> from pREST- <i>mCherry</i> inserted into <i>NotI</i> and <i>BamHI</i> sites    | F528 , R529 | Kan <sup>R</sup> | This study |
| pSC4141 | A plasmid expressing <i>mCherry</i> deleted of its stop codon and with <i>scaI</i> site added                                                       | F982, R983  | Kan <sup>R</sup> | This study |
| pSC4144 | A plasmid expressing <i>mCherry</i> fused to <i>nleE<sub>IE6</sub>-6his</i> via CMV promoter (derivative of pEGFP, Clonotech), PCR on strain EM3327 | F984, R985  | Kan <sup>R</sup> | This study |
| pSC4350 | A plasmid expressing <i>mCherry</i> fused to <i>nleE<sub>IE2</sub>-6his</i> via CMV promoter (derivative of pEGFP, Clonotech), PCR on strain EM3347 | F984, R985  | Kan <sup>R</sup> | This study |

**References:**

1. Schlosser-Silverman E, Elgrably-Weiss M, Rosenshine I, Kohen R, Altuvia S (2000) Characterization of Escherichia coli DNA lesions generated within J774 macrophages. *J Bacteriol* 182: 5225-5230.
2. Mills E, Baruch K, Charpentier X, Kobi S, Rosenshine I (2008) Real-time analysis of effector translocation by the type III secretion system of enteropathogenic Escherichia coli. *Cell Host Microbe* 3: 104-113.
