# Supplementary material for: The Type III Secretion Effector NleE Inhibits NF-κB Activation
Source: PubMed Central journal article supplement (PMC2813277; doi:10.1371/journal.ppat.1000743), 2010-01-29
Supplement: ppat.1000743.s003.pdf [file ppat.1000743.s003.pdf]

| Name                                                                                                                            | Sequence                                                                                 | Used to create: |
|---------------------------------------------------------------------------------------------------------------------------------|------------------------------------------------------------------------------------------|-----------------|
| Primers used for the creation of large EPEC chromosomal island deletions.<br>Letters in bold for antibiotics cassette homology. |                                                                                          |                 |
| F695                                                                                                                            | CTTATCAATTTGTTGCAACGAACAGGTC <b>ACTATCAGTCAA</b> AATAAAATCAT <b>GTGTAGGCTGGAGCTGCTTC</b> | EM3321          |
| R696                                                                                                                            | GTT <b>CATTTT</b> CACTCTCTGGCGAGTGCCTCGATTACTGCGATATTTAGTTAACATATGAATATCCTCCTTAG         | EM3321          |
| F665                                                                                                                            | CGCTATCACGCGAGGAGATTTT <b>GAGGATGGTTGAGAGGATTGCTGGG</b> TAGT <b>GTGTAGGCTGGAGCTGCTTC</b> | EM3323          |
| R666                                                                                                                            | TGACGCTGGCAGGGACAATCATCGTCATGGTATGGCCAGGATTAGGATAAA <b>CATATGAATATCCTCCTTAG</b>          | EM3323          |
| F628                                                                                                                            | TTAATTATCAGTAAATTAATGTAAGTAGGTCATTATTAGTCAA <b>AATAAAA</b> GT <b>GTAGGCTGGAGCTGCTTC</b>  | EM3325          |
| R629                                                                                                                            | TGTGTGCCTCCGTTTGCCCCACCAATATATATTT <b>CAGCACAAGAA</b> CACAGCATATGAATATCCTCCTTAG          | EM3325          |
| F668                                                                                                                            | GATTGCGTACGTTCCGGCACTTTGCCAACGTACGCTACATGCATACAGTTAAGT <b>GTAGGCTGGAGCTGCTTC</b>         | EM3327          |
| R669                                                                                                                            | CCAGCCCTGTGCAGGCTGGCGTCAGAGGAATGAAGCCTGGT <b>GAGTGAGCTTCATATGAATATCCTCCTTAG</b>          | EM3327          |
| F698                                                                                                                            | TTACAACACTTTTTTCC <b>TGAGATGGTGACGGATATTC</b> CATATGGTGT <b>TTATGTGTAGGCTGGAGCTGCTTC</b> | EM3329          |
| R699                                                                                                                            | TGGCGCGCTTCTCGTCTGCTGAATAAGAAGGTGAGCGAATTAGATGATTAACATATGAATATCCTCCTTAG                  | EM3329          |
| F701                                                                                                                            | GTACGACTGGATCCGTGGGTGTTTATGTTCTCCGCAGGATATCGTTTTT <b>AAGTGTAGGCTGGAGCTGCTTC</b>          | EM3331          |
| R702                                                                                                                            | GCGGCACTGAAAGCTTTTGTACAACCGATGAAAGCGGCTACACGACGTTAACATATGAATATCCTCCTTAG                  | EM3331          |
| F704                                                                                                                            | AAAAACACAGCCAACCACAACAATAACAGGGATGTGGTCACTTTGTGGATGT <b>GTAGGCTGGAGCTGCTTC</b>           | EM3333          |
| R705                                                                                                                            | CAGAAGTTAAAAGCCGGGTCGAAAACGCTTCGCCAAAGACGAGTAATCTCATATGAATATCCTCCTTAG                    | EM3333          |
| F671                                                                                                                            | AAGATGACGACGATGTACAAAAAGTTTATCATAACGTCGCAAATCTCTAAT <b>GTGTAGGCTGGAGCTGCTTC</b>          | EM3335          |
| R672                                                                                                                            | CTCGATCCGAGCCGCAAAAGTGTGAAAAAAGCCAGTTGTGT <b>CGGAATAAACATATGAATATCCTCCTTAG</b>           | EM3335          |

|                                                                                                      |                                                                          |         |
|------------------------------------------------------------------------------------------------------|--------------------------------------------------------------------------|---------|
| F674                                                                                                 | GCGATTAATACTGCGCGTAATATAATTA AAAATCCAGCATTCTCAATCCATGTGTAGGCTGGAGCTGCTTC | EM3337  |
| R675                                                                                                 | CCAAAAAGCTGAAAGCTATGGGCGAAATGAAAAACGGCGAAGCGAAGTAATCATATGAATATCCTCCTTAG  | EM3337  |
| F707                                                                                                 | GAGAAATGATGCAGTGGTGGGCGGACTGGCTTGATGAAAAGGTAGGGTGATGTGTAGGCTGGAGCTGCTTC  | EM3339  |
| R708                                                                                                 | GGGCGATGAGCGAATTCATTTTAGCGTTTTCCATAGTACGTCTCTTTGCGCCATATGAATATCCTCCTTAG  | EM3339  |
| F710                                                                                                 | ATGGCGGTTACCGACGGTCAATCAAATCTAAAGCTGGCATGATGCCTCCTGTGTAGGCTGGAGCTGCTTC   | EM3341  |
| R711                                                                                                 | CGGGCGGGCGATCCGTCACGTGTTCTTCTGATGACGCGGAGATAACACATCACATATGAATATCCTCCTTAG | EM3341  |
| F713                                                                                                 | AAAGCGTGGGCAAAGCAGAAGAGAATAAATCAGATAGCTGGTTAACTAAAGTGTAGGCTGGAGCTGCTTC   | EM3343  |
| R714                                                                                                 | CACGGTGACGATGGCTTTGCGTACCCGATGTAACGTATTCAGGTGTTTCGTACATATGAATATCCTCCTTAG | EM3343  |
| F645                                                                                                 | CGCGAATGGCAGGTGGATAAAGCGCGTATCATGAAAAACGCCATCGTTAAGTGTAGGCTGGAGCTGCTTC   | EM3345  |
| R646                                                                                                 | CCTAATAGAAGTATGAGTGGAAGATGTGTTTATCAGGGATGAGATGGCTTTTATATGAATATCCTCCTTAG  | EM3345  |
| F677                                                                                                 | CTCCTTCTGGCAATGCCGCTTTCCGCCGCTGGACCGACTGGTTTGCCTGAGTGTAGGCTGGAGCTGCTTC   | EM3347  |
| R678                                                                                                 | GTGAATGTGCAGCGGCTGGAGTTTGGGCGGGTAAAGTATCAGGAGATTAACATATGAATATCCTCCTTAG   | EM3347  |
| F716                                                                                                 | CAGTAAACGGCATATTATCAGTGATAGTTCAAACAGTTAGTAGGTAGAAAAGTGTAGGCTGGAGCTGCTTC  | EM3349  |
| R717                                                                                                 | TTTCTGACAGGTTTGTAGAAGCAATTTTGCAGTTTTGGCGCGAAAGGTGAGCATATGAATATCCTCCTTAG  | EM3349  |
| <b>Primers used for bacterial deletions: Letters in upper case for antibiotics cassette homology</b> |                                                                          |         |
| F398                                                                                                 | <i>gc tctaga gacgcaagtaacggttg</i>                                       | pCN2691 |
| R399                                                                                                 | <i>gc gaattc cgctgtcacctcttcatg</i>                                      | pCN2691 |
| F435                                                                                                 | atgcatggtgatgtttgtaagaaagtaaagattgattcatttgaagg GTGTAGGCTGGAGCTGCTTC     | CN2785  |
| R436                                                                                                 | accaactccatccatgcaacaaatccactacactggataaaactactaaa CATATGAATATCCTCCTTA   | CN2785  |
| F748                                                                                                 | Ctgaatatgttcaatctgaaactggctgagtatctggtactgtacaacag GTGTAGGCTGGAGCTGCTTC  | SC3518  |

|      |                                                                           |                                      |
|------|---------------------------------------------------------------------------|--------------------------------------|
| R749 | Gcactgtagtggcacagaacttctgcgacctgaccatcctaaatagctgc CATATGAATATCCTCCTTAG   | SC3518                               |
| F880 | aagacctgaagctcagtggcatggatactattgagctcagaatggcgag GTGTAGGCTGGAGCTGCTTC    | SC3722                               |
| F882 | ccgtctaaatgacggggcgatattaacatgattagaacaagaggaattht GTGTAGGCTGGAGCTGCTTC   | SC3681                               |
| F884 | aagtctccggttggttgaaaaatcgttcttaggtatagattcag GTGTAGGCTGGAGCTGCTTC         | SC3680                               |
| F861 | tatattattccactgtcagcgggaaaattatagaaaggatacaaacat GTGTAGGCTGGAGCTGCTTC     | SC3720                               |
| F888 | actgagc gatccgatcatagcacaattccccgcgacgaatgacgcctg GTGTAGGCTGGAGCTGCTTC    | SC3678                               |
| R889 | cacattgaacggcactgatgattgcgcgtatcgtatcgtgaagcgcctg CATATGAATATCCTCCTTAG    | SC3678,<br>3680, 3681,<br>3720, 3722 |
| F946 | ccgtctaaatgacggggcgatattaacatgattagaacaagaggaattht CAAGAGGGTCATTATATTTTCG | SC3909, 4102                         |
| R947 | atctgaatctatacctaagaacgatattttcaaccacaaccggaagacact CGACATCTTGGTTACCG     | SC4102                               |
| F948 | aagtctccggttggttgaaaaatcgttcttaggtatagattcag CAAGAGGGTCATTATATTTTCG       | SC3908                               |
| R949 | taatgaaatagaattaatttagccccctacacaagtggctgagctteta CTCGACATCTTGGTTACCG     | SC3908, 3909                         |

| Primers used for cloning: italics for restriction site upper case for stop codon, underline for 6His |                                                                                   |                                                                                                                                                                      |
|------------------------------------------------------------------------------------------------------|-----------------------------------------------------------------------------------|----------------------------------------------------------------------------------------------------------------------------------------------------------------------|
| R874                                                                                                 | cg <i>ctgcag</i> TTA <u>gtgatggatggtgatg</u><br>ccatgaactgctggtatac               | To clone <i>nleB</i> <sub>IE6</sub> -6His with <i>PstI</i> site                                                                                                      |
| F875                                                                                                 | cg <i>gaattc</i> atg attaactctg ttactaatactc                                      | To clone <i>nleE</i> <sub>IE6</sub> into pSA10 with <i>EcoRI</i> site                                                                                                |
| R876                                                                                                 | cg <i>ctgcag</i> TTA <u>gtgatggatggtgatg</u><br>ctcaatttagaaagtttattattatg        | To clone <i>nleE</i> <sub>IE6</sub> -6His into pSA10 with <i>PstI</i> site                                                                                           |
| F941                                                                                                 | gc <i>gaattc</i> tacctaagcaggtcagcgg                                              | To clone <i>nleB</i> <sub>IE6</sub> with its promoter region into pSA10                                                                                              |
| F528                                                                                                 | taa <i>gatcc</i> cgccaccatgg                                                      | To clone <i>mCherry</i> from pRSET-B into pEGFP-N1 with <i>BamHI</i> site                                                                                            |
| R529                                                                                                 | gagtc <i>gcgccgc</i> ttactgtacagctgtccatg                                         | To clone <i>mCherry</i> from pRSET-B into pEGFP-N1 with <i>NotI</i>                                                                                                  |
| F982                                                                                                 | ga <i>gctga</i> caagtactgcgccgcgactctagatc                                        | To create <i>ScaI</i> site instead of stop codon in pMS30                                                                                                            |
| R983                                                                                                 | gatctag agtcgcgccgc agtact tgtacagctc                                             | To create <i>ScaI</i> site instead of stop codon in pMS30                                                                                                            |
| F807                                                                                                 | ggttg <i>ggtacc</i> atgattaatcctgttactaatactc                                     | To create both <i>nleE</i> <sub>IE2</sub> - <i>blaM</i> and <i>nleE</i> <sub>IE6</sub> - <i>blaM</i> fusions in pHG3760 and pHG3761 respectively, with <i>KpnI</i> . |
| R808                                                                                                 | gc <i>gaattc</i> cc ctctatttagcaaatattattatg                                      | Used to create the <i>nleE</i> <sub>IE2</sub> - <i>blaM</i> fusion in pHG3760 with <i>EcoRI</i>                                                                      |
| R811                                                                                                 | gc <i>gaattc</i> cc ctcaatttagaaagtttattattatg                                    | Used to create the <i>nleE</i> <sub>IE6</sub> - <i>blaM</i> fusion in pHG3761 with <i>EcoRI</i>                                                                      |
| F984                                                                                                 | aaa <i>agtact</i> cg atg attaactctg ttactaatactc                                  | To clone <i>nleE</i> <sub>IE6</sub> or <i>nleE</i> <sub>IE2</sub> downstream to <i>mCherry</i> with <i>ScaI</i>                                                      |
| R985                                                                                                 | ataagaat <i>gcgccgc</i> TTA <u>gtgatggatggtgatg</u><br>ctcaatttagaaagtttattattatg | To clone <i>nleE</i> <sub>IE6</sub> or <i>nleE</i> <sub>IE2</sub> downstream to <i>mCherry</i> with His6 with <i>NotI</i>                                            |
