# Supplementary material for: The Type III Secretion Effector NleE Inhibits NF-κB Activation
Source: PLoS Pathog. 2010 Jan 29;6(1):e1000743. doi: 10.1371/journal.ppat.1000743 (PMC2813277; doi:10.1371/journal.ppat.1000743)
Supplement: Table S1 — Strains. All strains are made in EPEC E2348/69. (0.02 MB PDF) [file ppat.1000743.s001.pdf]

| Name     | Description                                          | Primers     | markers                             | source     |
|----------|------------------------------------------------------|-------------|-------------------------------------|------------|
| E2348/69 | Wild type                                            |             |                                     |            |
| CVD452   | $\Delta escN::kan$                                   |             | Kan <sup>R</sup>                    | [1]        |
| SN1961   | $\Delta escV::kan$                                   |             | Kan <sup>R</sup>                    | [2]        |
| CN2695   | $\Delta nleH_{PP2}::pCN2691$                         |             | Amp <sup>R</sup> , Sm <sup>R</sup>  | This study |
| CN2785   | $\Delta nleH_{PP6}::kan$                             | #435 + #436 | Kan <sup>R</sup>                    | This study |
| CN2815   | $\Delta nleH_{PP6}::kan, \Delta nleH_{PP2}::pCN2691$ |             | Kan <sup>R</sup> , Amp <sup>R</sup> | This study |
| EM3327   | $\Delta IE2::kan$                                    | #668 + #669 | Kan <sup>R</sup>                    | This study |
| EM3347   | $\Delta IE6::kan$                                    | #677 + #678 | Kan <sup>R</sup>                    | This study |
| SC3518   | $\Delta orf1, EspL, nleBE, orf2::kan$                | #748 + #749 | Kan <sup>R</sup>                    | This study |
| SC3678   | $\Delta orf2::kan$                                   | #888 + #889 | Kan <sup>R</sup>                    | This study |
| SC3680   | $\Delta nleE, orf2::kan$                             | #884 + #889 | Kan <sup>R</sup>                    | This study |
| SC3681   | $\Delta nleBE, orf2::kan$                            | #882 + #889 | Kan <sup>R</sup>                    | This study |
| SC3720   | $\Delta espL, nleBE, orf2::kan$                      | #861 + #889 | Kan <sup>R</sup>                    | This study |
| SC3722   | $\Delta orf1, EspL, nleBE, orf2::kan$                | #880 + #889 | Kan <sup>R</sup>                    | This study |
| SC3908   | $\Delta IE2::kan$ and $nleE_{IE6}::tet$              | #948 + #949 | Kan <sup>R</sup> , Tet <sup>R</sup> | This study |
| SC3909   | $\Delta IE2::kan$ and $nleBE_{IE6}::tet$             | #946 + #949 | Kan <sup>R</sup> , Tet <sup>R</sup> | This study |
| SC4102   | $\Delta IE2::cm$ and $nleB_{IE6}::tet$               | #946 + #947 | Cm <sup>R</sup> , Tet <sup>R</sup>  | This study |

**References:**

1. Jarvis KG, Giron JA, Jerse AE, McDaniel TK, Donnenberg MS, et al. (1995) Enteropathogenic *Escherichia coli* contains a putative type III secretion system necessary for the export of proteins involved in attaching and effacing lesion formation. *Proc Natl Acad Sci U S A* 92: 7996-8000.
2. Nadler C, Shifrin Y, Nov S, Kobi S, Rosenshine I (2006) Characterization of enteropathogenic *Escherichia coli* mutants that fail to disrupt host cell spreading and attachment to substratum. *Infect Immun* 74: 839-849.
